# Supplementary material
Source: PubMed Central journal article supplement (PMC7312233)
Supplement: ciz808_suppl_supplementary_appendix.pdf [file ciz808_suppl_supplementary_appendix.pdf]

# Supplementary Appendix 2 (Technical Supplement): Clinical and Epidemiological Aspects of Diphtheria

Shaun A Truelove<sup>1,‡</sup>, Lindsay T Keegan<sup>1,‡,\*</sup>, William J. Moss<sup>1,2</sup>, Lelia H. Chaisson<sup>1</sup>,  
Andrew S. Azman<sup>1,3</sup>, Emilie Macher<sup>3</sup>, and Justin Lessler<sup>1,\*</sup>

<sup>1</sup>Department of Epidemiology, Johns Hopkins Bloomberg School of Public Health, Baltimore, MD, USA

<sup>2</sup>International Vaccine Access Center, Department of International Health, Johns Hopkins Bloomberg School of Public Health, Baltimore, USA

<sup>3</sup>Médecins Sans Frontières, Geneva, Switzerland

\*justin@jhu.edu lindsay.keegan@utah.edu

‡these authors contributed equally to this work

## Contents

|          |                                                                                             |          |
|----------|---------------------------------------------------------------------------------------------|----------|
| <b>1</b> | <b>Clinical Course and Natural History</b>                                                  | <b>3</b> |
| 1.1      | Proportion asymptomatic, $p_k$ . . . . .                                                    | 3        |
| <b>2</b> | <b>Epidemiology</b>                                                                         | <b>4</b> |
| 2.1      | Proportion of secondary cases caused by asymptomatic individuals, $\tau$ . . . . .          | 4        |
| <b>3</b> | <b>The Reproductive Numbers, <math>R_0</math> and <math>R</math></b>                        | <b>4</b> |
| 3.1      | Derivation of the theoretical equation for the effective reproductive number, $R$ . . . . . | 4        |
| 3.2      | Derivation of the basic reproductive number, $R_0$ . . . . .                                | 5        |
| <b>4</b> | <b>Estimating Reproductive Numbers from Data</b>                                            | <b>5</b> |
| 4.1      | Outbreak data . . . . .                                                                     | 5        |
| 4.2      | Outbreak vaccination data . . . . .                                                         | 6        |
| 4.3      | Outbreak $R$ estimation . . . . .                                                           | 6        |
| 4.4      | Bayesian hierarchical framework . . . . .                                                   | 7        |
| 4.5      | Sensitivity analysis: Variability of vaccination coverage estimates . . . . .               | 8        |

|                                                              |           |
|--------------------------------------------------------------|-----------|
| <b>5 Diphtheria Control and Outbreak Response</b>            | <b>8</b>  |
| 5.1 Critical vaccination threshold, $V_c$                    | 8         |
| 5.2 Proportion reduction in transmission from vaccination    | 9         |
| 5.3 Critical vaccination threshold with treatment, $V_{c,T}$ | 9         |
| 5.4 Isolation of Symptomatic Cases Only                      | 10        |
| <b>References</b>                                            | <b>10</b> |

**Table 1.** Table of parameters used in the technical supplement, their meaning, and for fixed parameters, their value.

| Parameter                        | Definition                                                                                                                             | Estimate                                 |
|----------------------------------|----------------------------------------------------------------------------------------------------------------------------------------|------------------------------------------|
| <b>Vaccination</b>               |                                                                                                                                        |                                          |
| VE                               | Vaccine effectiveness                                                                                                                  | 3 doses are 87.2%                        |
| $p$                              | Proportion of the infected population experiencing symptomatic disease                                                                 | varies by outbreak                       |
| $p_k$                            | Proportion symptomatic after receiving $k$ doses of the vaccine                                                                        | $p_0 = 0.69, p_{1,2} = 0.52, p_3 = 0.12$ |
| $V_k$                            | Proportion receiving $k$ doses of vaccine                                                                                              | varies by outbreak                       |
| $r$                              | Reported vaccination coverage among incompletely or unvaccinated individuals in the population                                         | varies by outbreak                       |
| <b>Relative transmissibility</b> |                                                                                                                                        |                                          |
| $X$                              | Ratio of the number of secondary infections from a symptomatic case to the number of secondary infections from an asymptomatic carrier | 4.3                                      |
| $\beta_S$                        | measure of daily infectiousness for symptomatic cases                                                                                  |                                          |
| $\beta_A$                        | measure of daily infectiousness for asymptomatic carriers                                                                              |                                          |
| $\tau$                           | Relative infectiousness of asymptomatic individuals                                                                                    | 0.24                                     |
| $\delta$                         | Relative infectiousness of treated symptomatic cases                                                                                   | 0.49                                     |
| <b>Duration of infection</b>     |                                                                                                                                        |                                          |
| $g(t)$                           | Proportion of untreated infections still infectious $t$ days later                                                                     |                                          |
| $g_T(t)$                         | Proportion of treated cases still infectious $t$ days later                                                                            |                                          |
| $T(t)$                           | Proportion of treated cases still infectious $t$ days after treatment                                                                  |                                          |
| <b>Reproductive numbers</b>      |                                                                                                                                        |                                          |
| $R_0$                            | Basic reproductive number                                                                                                              | 2.73                                     |
| $R$                              | Effective reproductive number                                                                                                          | varies by outbreak                       |
| $R_S$                            | The reproductive number for untreated, symptomatic cases                                                                               | 3.19                                     |
| $R_A$                            | The reproductive number for asymptomatic carriers                                                                                      | 0.76                                     |
| $\tilde{R}_S$                    | The reproductive number for symptomatic cases where some proportion are treated                                                        | varies by outbreak                       |
| $R_T$                            | The reproductive number for treated, symptomatic cases                                                                                 | 1.56                                     |
| $R_{3d}$                         | The reproductive number for individuals fully vaccinated (3 doses)                                                                     | 1.05                                     |
| $R_{3d}$                         | The reproductive number for individuals never vaccinated (0 doses)                                                                     | 2.44                                     |
| <b>Intervention</b>              |                                                                                                                                        |                                          |
| $\alpha$                         | Proportion of symptomatic cases that are treated                                                                                       | varies by outbreak                       |
| $x$                              | the proportion of symptomatic infections that are not treated                                                                          | varies by outbreak                       |
| $V_c$                            | Critical vaccination threshold in an untreated population                                                                              | varies by outbreak                       |
| $V_{c,T}$                        | Critical vaccination threshold in an treated population                                                                                | varies by outbreak                       |
| $x$                              | The proportion of symptomatic cases that need to be treated to reduce R below 1                                                        | varies by outbreak                       |

# 1 Clinical Course and Natural History

## 1.1 Proportion asymptomatic, $p_k$

To estimate the proportion of diphtheria infections who have been vaccinated  $k$  times that are asymptomatic, we pooled data from all closed outbreaks (i.e., within schools) with information on the immunization status of all infections (2 studies).<sup>1,2</sup> We estimated the proportion of individuals who experience asymptomatic infection who have never received diphtheria vaccine  $p_0$ . To calculate the proportion of individuals who experience asymptomatic infection with imperfect vaccination (1-2 doses),  $p_{1,2}$  and the proportion of individuals who experience asymptomatic infection who have received full vaccination (3 doses),  $p_3$ , we use the vaccine effectiveness. We know that the vaccine effectiveness is how effective the vaccine is at preventing symptoms relative to unvaccinated individuals. So we know that:

$$1 - VE_3 = \frac{p_3}{p_0} \quad (1)$$

Re-arranging, we solve for  $p_3$  and find:

$$p_3 = (1 - VE_3)p_0 \quad (2)$$

likewise, given the vaccine effectiveness for incomplete vaccination,

$$1 - VE_{1,2} = \frac{p_{1,2}}{p_0} \quad (3)$$

Re-arranging, we solve for  $p_{1,2}$  and find:

$$p_{1,2} = (1 - VE_{1,2})p_0 \quad (4)$$

We estimate  $p_3$  and  $p_{1,2}$  within the hierarchical Bayesian framework used to estimate  $R_0$  (see section 4 below).

## 14 2 Epidemiology

### 15 2.1 Proportion of secondary cases caused by asymptomatic individuals, $\tau$

16 To calculate the relative contribution of asymptomatic carriers over the course of infection, we first assume that given someone  
17 is colonized with diphtheria, the relative transmissibility is constant over time. Then, we write

$$X = \frac{\beta_S \int g(t) dt}{\beta_A \int g(t) dt} \quad (5)$$

18 where  $X$  is the relative number of secondary infections caused by symptomatic cases compared to asymptomatic carriers (Doull  
19 and Lara 1925<sup>3</sup>); we estimated this to be  $\frac{59/758}{14/779}$ .  $\beta_S$  and  $\beta_A$  are measures of daily infectiousness for symptomatic cases and  
20 asymptomatic carriers, respectively; and  $g(t)$  is the proportion of untreated infections still infectious  $t$  days later. Here we  
21 assume that ratios of secondary transmissions to household contacts between asymptomatic and symptomatic individuals is  
22 representative of the ratio of secondary infections by asymptomatic and symptomatic individuals overall.

23 We define  $\tau := \beta_A/\beta_S$ , thus, solving for  $\tau$ , we find

$$\tau = \frac{1}{X} \quad (6)$$

24 Using the number of infected and uninfected contacts in Doull and Lara 1925<sup>3</sup>, we estimate  $\tau$  in a Bayesian framework where  
25 the number of secondary infections from either symptomatic or asymptomatic infections were binomially distributed.

## 26 3 The Reproductive Numbers, $R_0$ and $R$

27 Because vaccination and infection do not produce immunity to infection, but rather immunity to symptomatic disease, and  
28 because of asymptomatic infections, which are typically unobserved, we need to derive new equations for the basic and effective  
29 reproductive numbers that account for this unique transmission process.

### 30 3.1 Derivation of the theoretical equation for the effective reproductive number, $R$

31 The effective reproductive number,  $R$ , is the average number of secondary infections from a single (average) infected individual  
32 in a population with some level of existing immunity, such as from vaccination or previous infection. Because with diphtheria  
33 immunity is in terms of immunity to symptomatic disease, rather than immunity to infection, we needed to derive a new  
34 equation that describes the relationship between vaccination/prior infection and symptomology. To start with an “average”  
35 individual, we need to account for both symptomatic and asymptomatic transmission and treatment. We can write  $R$  as a

36 weighted sum of the contributions by symptomatic and asymptomatic infected individuals as follows:

$$R = \sum_{k=0}^3 (V_k) ((p_k((1 - \alpha)R_S + \alpha R_T) + (1 - p_k)R_A) \quad (7)$$

37 where  $V_k$  is the proportion of the population receiving  $k$  doses (such that  $\sum V_k = 1$ ),  $p_k$  is the proportion of the population  
38 which are symptomatic with  $k$  doses of the diphtheria vaccine,  $R_S$  is the average number of infections caused by a single  
39 infected symptomatic individual in an otherwise totally susceptible population (the symptomatic reproduction number),  $R_T$  is  
40 the average number of secondary infections caused by a single treated symptomatic case in an otherwise totally susceptible  
41 population,  $R_A$  is the analogous term for untreated asymptomatic infections, and  $\alpha$  is the proportion treated.

### 42 **3.2 Derivation of the basic reproductive number, $R_0$**

43 From the equation for the effective reproductive number we can derive an equation for the basic reproductive number,  $R_0$ ,  
44 where we assume a completely immunologically naive population (i.e., no vaccination or prior infection) and no treatment  
45 with antibiotics. Setting  $V_{1,2} = 0\%$  and  $V_3 = 0\%$ , and thus  $V_0 = 100\%$ , we are left with the following equation for  $R_0$ :

$$R_0 = p_0 R_S + (1 - p_0) R_A \quad (8)$$

46 where  $p_0$  is the proportion of the population that are symptomatic (despite being completely naive to diphtheria infection, a  
47 significant portion of infections will be asymptomatic).

## 48 **4 Estimating Reproductive Numbers from Data**

49 We estimated the basic and effective reproductive numbers for diphtheria using data from 23 outbreaks occurring from  
50 1901-2018. From these data, we first estimated outbreak specific effective reproductive numbers,  $R$ , using methods described  
51 by White and Pagano which estimate  $R$  from the early exponential growth period of the epidemic.<sup>4</sup> Using these estimates  
52 of  $R$ , we estimate a basic reproductive number,  $R_0$ , across all outbreaks using the diphtheria-specific equations derived  
53 above, which account for the contribution of asymptomatic infections to transmission and the impact of vaccination on  
54 rates of symptomatic/asymptomatic infection. All of this was implemented in a hierarchical Bayesian framework, which we  
55 implemented using R, Stan, and the R package rstan.

### 56 **4.1 Outbreak data**

57 We used data from 23 separate outbreaks occurring from 1901-2018 for which daily or weekly case counts were available.  
58 For outbreaks in which case count data were aggregated by week, we estimated daily case counts by fitting a spline to the  
59 cumulative density function of the epidemic curve to produce probabilities for each day of each week, from which daily cases

60 were imputed to generate a dataset of daily case counts that was used in the model<sup>5,6</sup>.

## 61 **4.2 Outbreak vaccination data**

62 For each outbreak, vaccination coverages for each stratum of doses (0, 1-2, 3+) were specified from one of three forms of  
63 available data: reported vaccination coverage for the population (reported from the paper), reported vaccination among cases,  
64 or estimated vaccination coverage from the WHO (for country-level outbreaks). We did not include outbreaks where these data  
65 were not available.

66  
67 For studies which only reported the vaccination among cases, we calculated the population-level vaccination coverage using  
68 our estimates for proportion symptomatic for each vaccination dose group ( $p_k$ ). For early studies prior to the existence of the  
69 3-dose primary vaccination series, we estimated the proportion receiving 0 or 1 – 2 doses ( $V_0$  and  $V_{1,2}$ ) using the following  
70 system of equations:

$$r = \frac{p_{1,2}V_{1,2}}{p_{1,2}V_{1,2} + p_0(1 - V_{1,2})} \quad (9)$$

$$1 = V_0 + V_{1,2} \quad (10)$$

71 Where  $r$  is the reported vaccination coverage among incompletely or unvaccinated individuals in the population,  $V_0$  is the  
72 proportion of the population with 0 doses, and  $V_{1,2}$  is the proportion of the population with 1 – 2 doses of the vaccine.

73 For studies from the three-dose vaccine series era, we can estimate these proportions when the population coverage with DTP3  
74 is reported but incomplete or unvaccinated proportions are not reported. We use *Eq. 9* again, but where  $V_0 + V_{1,2} + V_3 = 1$  and  
75  $V_3$  is known.

## 76 **4.3 Outbreak $R$ estimation**

77 Our Bayesian framework first uses an adaptation of previously described methods from White and Pagano to estimate the  $R$  for  
78 each outbreak during its initial exponential growth phase.<sup>4</sup> This method also allows for simultaneous estimation of the serial  
79 interval (time between symptom onsets of consecutive infections in a transmission chain) using surveillance data (i.e., cases by  
80 time). However, for the the final results, we specified the serial interval as what we previously estimated from individual-based  
81 data (gamma distribution with mean=1.36 and sd=5.97)). This was done to maintain consistency with our previous results, in  
82 which we have more confidence due to coming from individual data (further, the resulting estimated serial interval was similar  
83 to our individual-based estimate).

84

85 The likelihood function for  $R$  was as follows:

$$L(R) = \prod_{t=1}^T \frac{e^{-\mu_t} \mu_t^{N_t}}{N_t!} \quad (11)$$

86 where  $\mu_t = R \sum_{j=1}^{\min(k,t)} N_{t-j} p_j$ , and  $N$  is the number of new cases at time  $t$ ,  $k$  is a constraint such that  $k < T$ , and  $p$  is the  
87 probability vector of the multinomial distribution describing the probability of a case occurring on a specific day, assuming the  
88 serial interval.

#### 89 4.4 Bayesian hierarchical framework

90 We integrated the White and Pagano methods for estimating  $R$  into a Bayesian hierarchical framework to estimate  $R_S$  (and thus  
91  $R_0$ ), based on a similar decomposition of  $R$  as shown in 7, where  $R_A = \tau R_S$ :

$$R = \sum_{k=0}^3 (V_k) ((p_k((1 - \alpha)R_S + \alpha R_T) + (1 - p_k)\tau R_S) \quad (12)$$

92 In this model, the  $\log(R_S)$  from each of the 23 outbreaks was assumed to come from a common normal distribution with mean  
93  $\log(R_S^*)$  and standard deviation  $\sigma$ . Both  $\log(R_S^*)$  and  $\sigma$  were assigned weakly informative priors (normal/truncated normal).  
94 We assigned a normal prior distribution to,  $\log(\tau)$ , the (log) proportion of secondary cases caused by asymptomatic individuals,  
95 with a mean of  $-1.437$  and standard deviation of  $0.09$ , based on our estimates described above. The relative transmission  
96 contribution of treated symptomatic individuals,  $\delta$ , was assumed come from a uniform distribution from  $0.4$ - $0.6$ , which implies  
97 an average delay to antibiotic treatment of  $2$ - $5$  days. For outbreaks before discovery of antibiotics, we set  $\delta$  to  $0$ .  $VE_{1,2}$ ,  
98  $VE_3$ , and  $p_0$  (used to estimate  $p_k$ ) were assumed to follow truncated normal distributions with means and standard deviations  
99 drawn from our separate analyses ( $VE_{1,2}$ : mean= $0.705$ , sd= $0.110$ ;  $VE_3$ : mean= $0.872$ , sd= $0.047$ ;  $p_0$ : mean= $0.69$ , sd= $0.097$ ).  $V_k$   
100 parameter estimates were allowed to follow normal distributions using the vaccination coverage data above for the means, and  
101 standard deviation assumed to be  $10\%$  of these means. See *Supplementary Appendix 1, Table S3* for full parameter estimates  
102 and data sources.

103

104 Using the joint posterior for the universal  $R_S$ ,  $p_0$ ,  $p_3$ , and  $\tau$ , we calculated  $R_0$  following *Eq. 8* above, and  $V_c$  following *Eq. 17* be-  
105 low. This model and estimation methods can be found in the source code repository (<https://github.com/shauntruelove/Diphtheria>)  
106 in the scripts `Run_R0stan.R` and `R0stan_knownGT_fixedCoV.stan`.

107

#### 108 **4.5 Sensitivity analysis: Variability of vaccination coverage estimates**

109 For our initial estimation of  $R_0$  from outbreak data, we wanted to allow the model to have flexibility in the vaccination coverage  
110 parameter. As such, for each outbreak we input priors for the mean vaccination coverage of 0, 1-2, and 3 or more doses, and we  
111 allow individual sampling distributions for coverages with each dose to follow a normal distribution with a standard deviation  
112 equivalent to the standard across all outbreaks for that dose, normalized by the mean for the outbreak ( $sd_m = CoV \cdot \mu_m$ ). As a  
113 result, the posterior distributions for the  $V$  parameters were broad. In order to not completely discard vaccination coverage data,  
114 we conducted a we conducted a sensitivity analysis restricting the standard deviations of the sampling distributions to 10% of  
115 the means. As a result,  $V_c$  was reduced by 1.8% and  $R_0$  by 12.3%. To maintain a balance between allowing the model to freely  
116 estimate the parameters and maximizing the data that we have, we use the estimates from the restricted variance model for our  
117 final calculations.

## 118 **5 Diphtheria Control and Outbreak Response**

### 119 **5.1 Critical vaccination threshold, $V_c$**

120 To determine the critical vaccination threshold, we first determine what proportion of the population needs to have received three  
121 doses of diphtheria vaccine ( $V_3$ ) to achieve herd immunity. For the critical vaccination threshold, we assume that individuals  
122 either have full vaccination or no vaccination, so we can re-write Eq. 7 as:

$$R = V_0(p_0R_S + (1 - p_0)R_A) + V_3(p_3R_S + (1 - p_3)R_A) \quad (13)$$

$$(14)$$

123 To achieve herd immunity, we want to estimate  $V_3$  when  $R < 1$ , so we solve for  $V_3$ :

$$1 > V_0(p_0R_S + \tau(1 - p_0)R_S) + V_3(p_3R_S + \tau(1 - p_3)R_S) \quad (15)$$

$$(16)$$

124 Thus, the critical vaccination threshold is:

$$V_c = \frac{1 - p_0R_S - \tau R_S + p_0\tau R_S}{(p_0 - p_3)R_S(\tau - 1)} \quad (17)$$



## 125 **5.2 Proportion reduction in transmission from vaccination**

126 To determine by what proportion three doses of diphtheria vaccine reduces transmission, we calculate the reproductive number  
127 for fully vaccinated individuals,  $R_{3d}$ , and the reproductive number of never vaccinated individuals,  $R_{0d}$ , and take the ratio.

We define  $R_{3d}$  as:

$$R_{3d} = p_3 R_S + (1 - p_3) \tau R_S \quad (18)$$

and  $R_{0d}$  as:

$$R_{0d} = p_0 R_S + (1 - p_0) \tau R_S \quad (19)$$

Thus the ratio is:

$$\frac{p_3 R_S + (1 - p_3) \tau R_S}{p_0 R_S + (1 - p_0) \tau R_S} = 0.41 \quad (20)$$

128 Thus, we show that fully vaccinated individuals cause 69% fewer secondary infections on average, over the course of their  
129 infection.

## 130 **5.3 Critical vaccination threshold with treatment, $V_{c,T}$**

131 The critical vaccination threshold determines what proportion of the population needs to be vaccinated to stop the spread of  
132 diphtheria, however, this assumes no treatment. To adjust for antibiotic treatment, we assume that only symptomatic individuals  
133 are treated and thus we can adjust the reproductive number of symptomatic individuals, where

$$\tilde{R}_S = (1 - \alpha) R_S + \alpha R_T \quad (21)$$

134  $\tilde{R}_S$  is the reproductive number for symptomatic individuals assuming some proportion,  $\alpha$ , are treated and  $R_T$  is the reproductive  
135 number for treated, symptomatic individuals. *Note:* we assume that asymptomatic individuals are not detected as cases and  
136 therefore are not treated.

137 We can then relate  $R_T$  and  $R_S$  as follows:

$$R_S = \delta R_T \quad (22)$$

138 where  $\delta$  is the relative infectiousness of treated individuals. To calculate  $\delta$  we follow the process in equation 5, where

$$delta = \frac{\beta_S \int_0^{30} (\alpha g_T(t) + (1 - \alpha)g(t))dt}{\beta_S \int_0^{30} g(t)dt} \quad (23)$$

139 and  $\delta = \beta_S/\beta_T$ . We assume that  $g_T(t)$  follows the distribution of carriage of untreated cases,  $g(t)$ , described in section 2.1,  
 140 prior to treatment and  $g(t) \cdot T(t)$  after the initiation of treatment. From this equation, we estimate  $\delta$  in our hierarchical Bayesian  
 141 framework. From this, we find  $\delta = 0.49$ .

142 Figure S9 shows the distribution  $g_T(t)$  compared to  $g(t)$  for a treatment delay of 5.9 days.<sup>7-17</sup>

143 To calculate the critical vaccination threshold with treatment,  $V_{c,T}$ , we return to equation 17 where:

$$R = V_0(p_0\tilde{R}_S + (1 - p_0)R_A) + V_3(p_3\tilde{R}_S + (1 - p_3)R_A) \quad (24)$$

We set  $R < 1$  to find the critical vaccination threshold, and solve for  $V_3$ , knowing  $V_0 = 1 - V_3$ :

$$1 > V_0(p_0\tilde{R}_S + (1 - p_0)R_A) + V_3(p_3\tilde{R}_S + (1 - p_3)R_A) \quad (25)$$

144 Thus, the critical vaccination threshold with treatment is is:

$$V_{c,T} = \frac{-1 + p_0R_S - p_0\alpha R_S + p_0\alpha\delta R_S - \tau R_S - p_0\tau R_S}{(p_0 - p_3)R_S(1 - \alpha + \alpha\delta - \tau)} \quad (26)$$

#### 145 **5.4 Isolation of Symptomatic Cases Only**

In many cases, it is more practical to treat only symptomatic infections. To determine what proportion of symptomatic cases need to be isolated to halt transmission, we write

$$xp_0R_S + (1 - p_0)R_A < 1 \quad (27)$$

Solving for  $x$ , we find

$$x = \frac{1 - (1 - p_0)R_A}{p_0R_S} \quad (28)$$

146 where  $x$  is the proportion of symptomatic infections that are not treated.

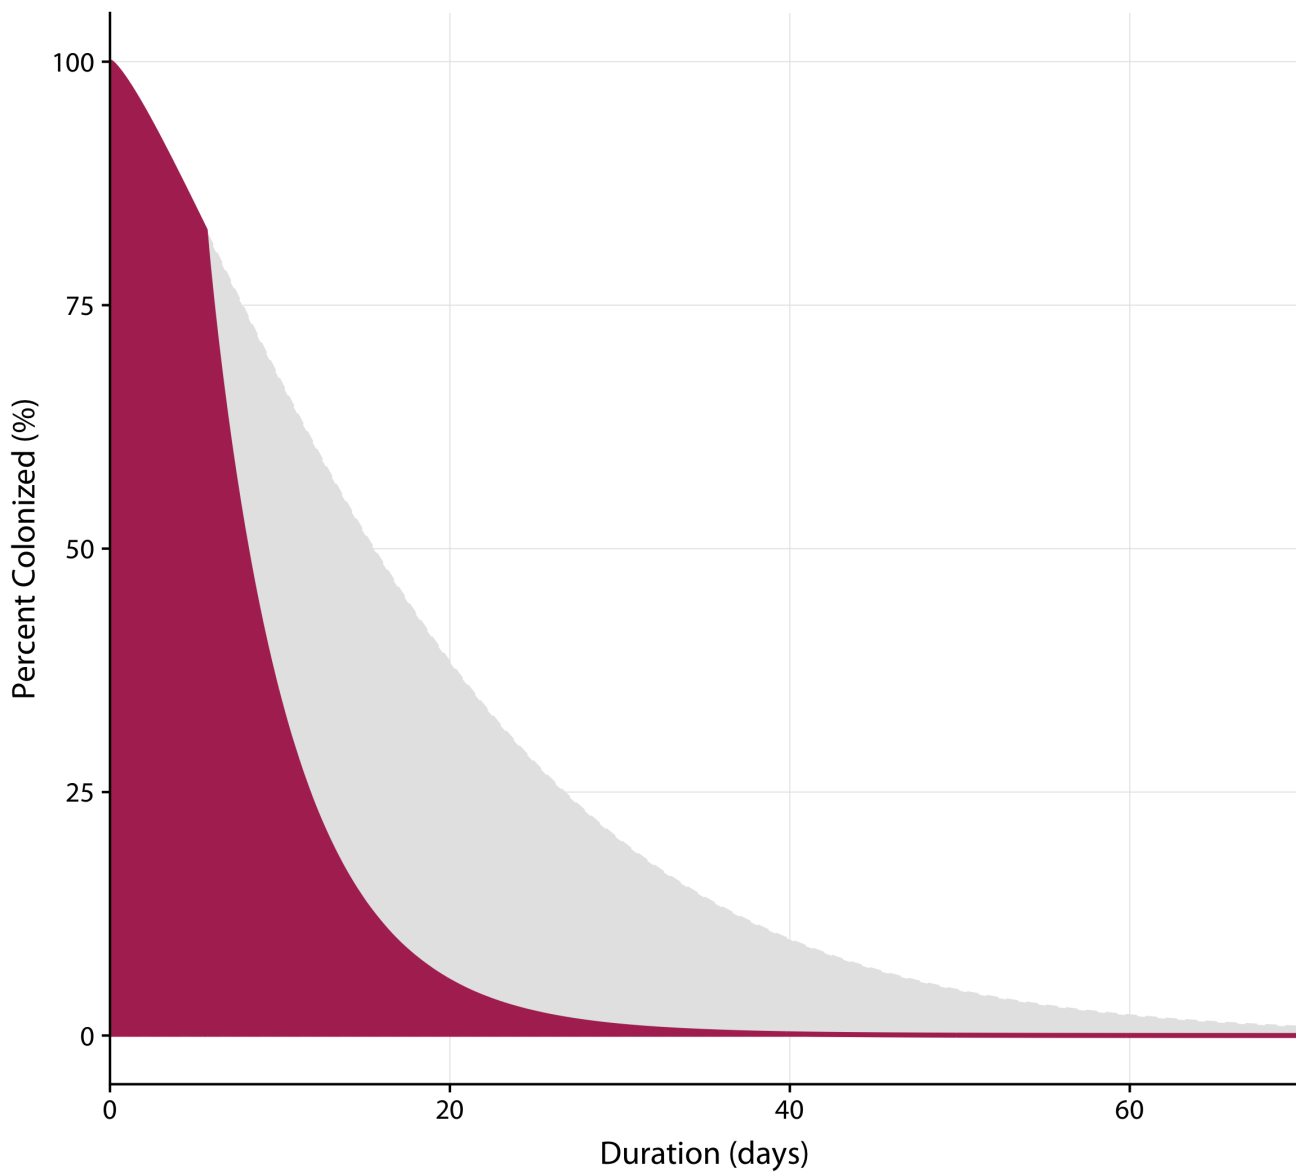

**Figure S9.** Clearance of *C. diphtheriae* in cases treated with antibiotics 2 days after developing characteristic symptoms (maroon), and untreated symptomatic infections (grey)

## References

- 147 **References**
- 148 **1.** Fanning, J. Diphtheria in an immunized community. *Br. Med. J.* **1**, 371 (1947).
- 149 **2.** Miller, L. W., Older, J. J., Drake, J. & Zimmerman, S. Diphtheria immunization: effect upon carriers and the control of  
150 outbreaks. *Am. J. Dis. Child.* **123**, 197–199 (1972).
- 151 **3.** Doull, J. A. & Lara, H. The epidemiological importance of diphtheria carriers. *Am. J. Epidemiol.* **5**, 508–529 (1925).
- 152 **4.** Forsberg White, L. & Pagano, M. A likelihood-based method for real-time estimation of the serial interval and reproductive  
153 number of an epidemic. *Stat. medicine* **27**, 2999–3016 (2008).
- 154 **5.** Efron, B. Bootstrap methods: another look at the jackknife. In *Breakthroughs in statistics*, 569–593 (Springer, 1992).
- 155 **6.** Harel, O. *et al.* Multiple imputation for incomplete data in epidemiologic studies. *Am. journal epidemiology* **187**, 576–584  
156 (2017).
- 157 **7.** CG Guthrie, BC Marshall, and WL Moss. Experimental inoculation of human throats with virulent diphtheria bacilli.  
158 *Bull. Johns Hopkins Hosp.* **XXXII** (1921).
- 159 **8.** Webb, J. W. & MacFADYEN, N. Field investigation of an outbreak of diphtheria. *Br. Med. J.* **2**, 248 (1947).
- 160 **9.** Heath Jr, C. W. & Zusman, J. An outbreak of diphtheria among skid-row men. *New Engl. J. Medicine* **267**, 809–812  
161 (1962).
- 162 **10.** Lys, H. G. AN EPIDEMIC OF DIPHTHERIA. *Lancet* **136**, 968–969 (1890).
- 163 **11.** Chalmers Parry, S. An investigation of a small epidemic of diphtheria in the hop-fields. *Public Heal.* **53**, 223–224 (1939).
- 164 **12.** Kehr, M. J., Tannahill, R. W., Elias-Jones, T. F. & Whittaker, L. Observations on a present-day outbreak of diphtheria.  
165 *Public Heal.* **74**, 294–303 (1960).
- 166 **13.** An outbreak of milk-borne diphtheria due to carrier cases. *Public Heal.* **22**, 149–150 (1908).
- 167 **14.** Miller, L. W., Bickham, S., Jones, W. L., Heather, C. D. & Morris, R. H. Diphtheria carriers and the effect of erythromycin  
168 therapy. *Antimicrob. Agents Chemother.* **6**, 166–169 (1974).
- 169 **15.** Beach, M. W., Gamble, W. B., Jr, Zemp, C. H., Jr & Jenkins, M. Q. Erythromycin in the treatment of diphtheria and  
170 diphtheria carrier state. *Pediatrics* **16**, 335–344 (1955).
- 171 **16.** Bixby, E. W. The effectiveness of penicillin in the treatment of nasopharyngeal diphtheria. *Am. J. Med. Sci.* **215**, 509–513  
172 (1948).
- 173 **17.** Kocher, R. A. & Siemsen, W. J. Diphtheria carriers treated with penicillin. *Ann. Intern. Med.* **24**, 883–886 (1946).
